# Supplementary material
Source: PubMed Central journal article supplement (PMC2834942)

**A**

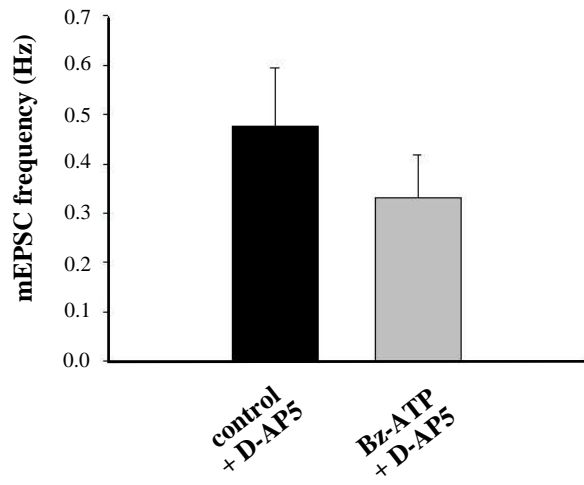

**B**

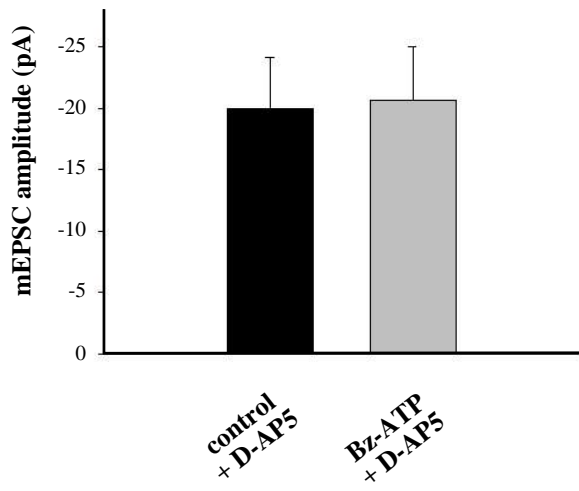

**C**

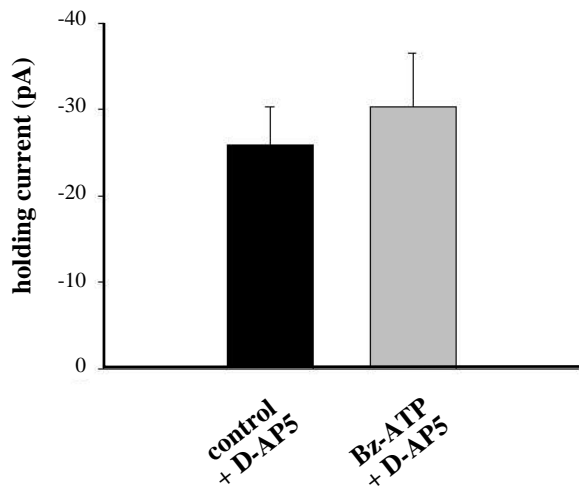

**SUPPLEMENTARY FIG.1**

Supplement: tjp0588-0831-SD1.pdf [file tjp0588-0831-SD1.pdf]

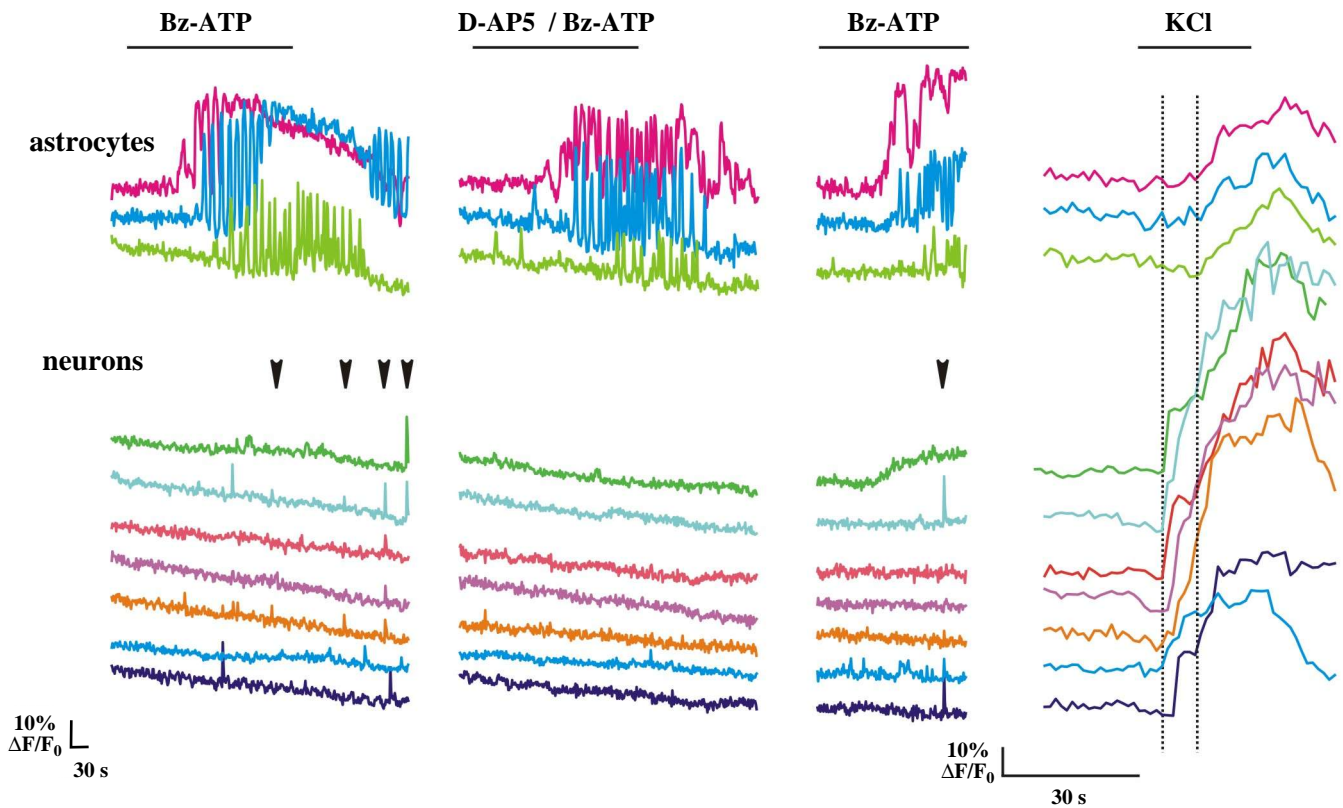

**SUPPLEMENTARY FIG.2**

Supplement: tjp0588-0831-SD2.pdf [file tjp0588-0831-SD2.pdf]
